# Supplementary material for: Chiral separation of substituted phenylalanine analogues using chiral palladium phosphine complexes with enantioselective liquid–liquid extraction
Source: Royal Society of Chemistry journal article supplement (doi:10.1039/b924749a), 2010-01-01
Supplement: b924749a.pdf [file b924749a.pdf]

## Instrumentation

The  $^{31}\text{P}$  NMR spectra used to follow the titration were recorded on a Varian Mercury Plus 500 ( $^1\text{H}$  NMR at 500 MHz,  $^{31}\text{P}$  NMR at 236 MHz). The FT-IR and FT-FIR spectra were recorded on a Perkin Elmer Spectrum 400 FT-IR/FT-FIR Spectrometer. The Raman spectra were recorded on a Perkin Elmer Raman Station 400F Raman Spectrometer.

## Chemicals

$\text{PdCl}_2(\text{CH}_3\text{CN})_2$ ,  $\text{PdI}_2$ ,  $\text{PdBr}_2$ ,  $\text{Pd}(\text{NO}_3)_2$ , (*R*)- and (*S*)-BINAP, (*S*)-tol-BINAP and (*S*)-xylyl-BINAP were obtained from Strem, DL-Trp was obtained from Merck,  $\text{Pd}(\text{OAc})_2$ , D- and L-Trp, DL-His, DL-Phe, DL-4- $\text{NO}_2$ -Phe and all organic solvents employed were obtained from Acros. DL-Val was obtained from Fluka. DL-4-MeO-Phe, DL-4-Br-Phe, DL-4-Cl-Phe and DL-4-F-Phe were obtained from Peptech. Water was doubly distilled. The acylated  $\alpha$ -amino acids were synthesized according to literature procedures and spectroscopic data correspond with those reported.<sup>1</sup>

All buffers solutions were prepared using  $\text{NaH}_2\text{PO}_4$ , obtained from Merck at a concentration of 100 mM and subsequent addition of HCl (aq) or NaOH (aq). The pH was measured using a Hanna Instruments pH 213 Microprocessor pH meter.

## $\text{PdCl}_2((S)\text{-xylyl-BINAP})_2$

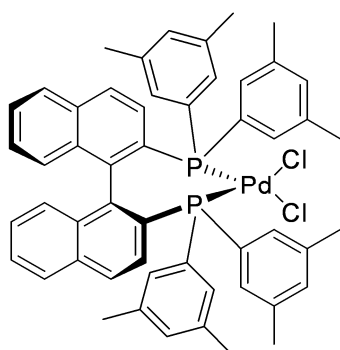

In a Schlenk tube under nitrogen, 100 mg (0.16 mmol) (*S*)-xylyl-BINAP and 40 mg (0.16 mmol) *cis*- $\text{PdCl}_2(\text{CH}_3\text{CN})_2$  were dissolved in 10 mL dichloromethane. The solution was stirred overnight and the solvent was evaporated *in vacuo*. The crude product was triturated with ether and dried in a vacuum oven overnight at 40 °C, yielding  $\text{PdCl}_2((S)\text{-xylyl-BINAP})_2$  (106 mg, 83 %) as a yellow solid.  $[\alpha]_{\text{D}}^{20} = -502.0^\circ$  (c 1.00,  $\text{CHCl}_3$ );  $^1\text{H}$  NMR (200 MHz,  $\text{CDCl}_3$ )  $\delta$  7.66 – 7.53 (m, 2H), 7.46 (d,  $J = 9.7$  Hz, 3H), 7.32 (d,  $J = 7.0$  Hz, 2H), 7.08 (d,  $J = 7.3$  Hz, 3H), 6.56 (d,  $J = 8.6$  Hz, 1H), 6.36 (s, 1H), 2.32 (s, 6H), 1.86 (s, 6H).  $^{13}\text{C}$  NMR (50 MHz,  $\text{CDCl}_3$ )  $\delta$  137.5, 137.4, 137.3, 137.2, 134.0, 133.4, 133.1, 133.0, 132.9, 132.9, 132.8, 132.8, 130.5, 129.7, 128.8, 128.6, 128.5, 127.9, 127.6, 127.0, 126.5, 105.0, 21.9, 21.3.  $^{31}\text{P}$  NMR (80 MHz,  $\text{CDCl}_3$ )  $\delta$  30.1. MS (ES)  $m/z$ : 876.8 ( $\text{M}^+ - \text{Cl}$ ). Anal. Calcd for  $\text{C}_{52}\text{H}_{48}\text{P}_2\text{Cl}_2\text{Pd}$ : C, 68.47; H, 5.30; Found: C, 68.08 H, 5.30.

### Extraction experiments and chemical analysis

All extraction experiments were carried out in 1.5 mL screw capped vials. In a standard experiment, a prepared palladium complex host was employed. For *in situ* experiments, the palladium precursor was stirred overnight with 1.1 eq of the phosphine ligand and the organic solvent was diluted to [host] = 1.0 mM. Part of the solution was evaporated to dryness and the residue was characterized by  $^{31}\text{P}$ -NMR. Full conversion to the palladium-phosphine complex was observed.

In a standard experiment, a 1.0 mM solution of the host in the organic phase was combined with a 2.0 mM solution of the substrate in the aqueous phase in equivolumous amounts (0.40 mL). Reactions were performed *in duplo* and a blank extraction ([host] = 0.0 mM) was performed concurrently to determine the physical partition of the substrate. The two phase systems were stirred overnight at 6 °C and subsequently allowed to settle for at least 30 min. The aqueous phase was analyzed by RP-HPLC, using Shimadzu CC-20AD pumps, a Crownpak CR(+) chiral column (Daicel, Japan) equipped with a guard column or a Chirobiotic T column (Astec, USA) and a SPD-M20A diode array detector. A calibration curve was prepared in the concentration range employed for the determination of the distribution. Error margins were typically 0.5-2.0 %. A flow rate of 0.5 mL/min of perchloric acid solution (pH = 1.0, 1.5 or 2.0) was used as a mobile phase for the Crownpak column. A flow rate of 0.24 mL/min of water (containing 0.0136 v-% TEAA buffer) and MeOH 0.06 mL/min was used as a mobile phase for the Chirobiotic T column. Extensive attempts towards the resolution of Cys on both columns did not result in a successful separation.

### Titration experiments followed by spectroscopy

Extractions were carried out as indicated above with the aqueous phase at pH = 7.0. The equivolumous amounts of the liquid phases of the extraction were increased to V = 0.6 mL. DCM was used in UV-Vis and CD spectroscopy experiments. In the  $^{31}\text{P}$ -NMR titrations,  $\text{CDCl}_3$  was used as solvent.  $\text{CDCl}_3$  gave extraction results which compared well with those in  $\text{CHCl}_3$ . After extraction of [substrate] = 10.0 mM with dcm as the organic phase, the organic layer was evaporated to dryness. The product obtained was characterized by FTIR and Raman spectroscopy.

### Reference List

1. M. Calmes, J. Daunis, R. Jacquier, and J. Verducci, *Tetrahedron*, 1987, **43**, 2285.
